# Supplementary material for: NetDI: Methodology Elucidating the Role of Power and Dynamical Brain Network Features That Underpin Word Production
Source: eNeuro. 2021 Jan 5;8(1):ENEURO.0177-20.2020. doi: 10.1523/ENEURO.0177-20.2020 (PMC7890525; doi:10.1523/ENEURO.0177-20.2020)
Supplement: Extended Data Table 3-3 — Sensitivity (recall or TPR), specificity (selectivity or TNR), precision for Gaussian process classification Download Table 3-3, ZIP file. [file enu-eN-NWR-0177-20-s04.zip]

Archive with 80 entries (70 files):
- eNeuro_NetDI_Extended_rev2.pdf
- __MACOSX/._eNeuro_NetDI_Extended_rev2.pdf
- NetDI_Code/
- __MACOSX/._NetDI_Code
- NetDI_Code/NetDI/
- __MACOSX/NetDI_Code/._NetDI
- NetDI_Code/DCS/
- __MACOSX/NetDI_Code/._DCS
- NetDI_Code/NetDI/InfoTheoryTools/
- __MACOSX/NetDI_Code/NetDI/._InfoTheoryTools
- NetDI_Code/DCS/ta503_DCS_classification_kfold_augmentation_In_out_kcores_Pat1.ipynb
- __MACOSX/NetDI_Code/DCS/._ta503_DCS_classification_kfold_augmentation_In_out_kcores_Pat1.ipynb
- NetDI_Code/DCS/ta511_DCS_classification_kfold_augmentation_In_out_kcores_Pat7.ipynb
- __MACOSX/NetDI_Code/DCS/._ta511_DCS_classification_kfold_augmentation_In_out_kcores_Pat7.ipynb
- NetDI_Code/DCS/ta505_DCS_classification_kfold_augmentation_In_Out_Kcores_Pat4.ipynb
- __MACOSX/NetDI_Code/DCS/._ta505_DCS_classification_kfold_augmentation_In_Out_Kcores_Pat4.ipynb
- NetDI_Code/DCS/ts016_DCS_classification_kfold_augmentation_In_Out_kcores_Pat5.ipynb
- __MACOSX/NetDI_Code/DCS/._ts016_DCS_classification_kfold_augmentation_In_Out_kcores_Pat5.ipynb
- NetDI_Code/NetDI/InfoTheoryTools/DITools/
- __MACOSX/NetDI_Code/NetDI/InfoTheoryTools/._DITools
- NetDI_Code/NetDI/InfoTheoryTools/TRENTOOL3/
- __MACOSX/NetDI_Code/NetDI/InfoTheoryTools/._TRENTOOL3
- NetDI_Code/NetDI/InfoTheoryTools/DITools/ConditionalMI.m
- __MACOSX/NetDI_Code/NetDI/InfoTheoryTools/DITools/._ConditionalMI.m
- NetDI_Code/NetDI/InfoTheoryTools/DITools/DI.m
- __MACOSX/NetDI_Code/NetDI/InfoTheoryTools/DITools/._DI.m
- NetDI_Code/NetDI/InfoTheoryTools/DITools/DIver2.m
- __MACOSX/NetDI_Code/NetDI/InfoTheoryTools/DITools/._DIver2.m
- NetDI_Code/NetDI/InfoTheoryTools/DITools/DIver3.m
- __MACOSX/NetDI_Code/NetDI/InfoTheoryTools/DITools/._DIver3.m
- NetDI_Code/NetDI/InfoTheoryTools/TRENTOOL3/nn_prepare.mexglx
- __MACOSX/NetDI_Code/NetDI/InfoTheoryTools/TRENTOOL3/._nn_prepare.mexglx
- NetDI_Code/NetDI/InfoTheoryTools/TRENTOOL3/nn_prepare.mexa64
- __MACOSX/NetDI_Code/NetDI/InfoTheoryTools/TRENTOOL3/._nn_prepare.mexa64
- NetDI_Code/NetDI/InfoTheoryTools/TRENTOOL3/nn_prepare.mexw64
- __MACOSX/NetDI_Code/NetDI/InfoTheoryTools/TRENTOOL3/._nn_prepare.mexw64
- NetDI_Code/NetDI/InfoTheoryTools/TRENTOOL3/nn_prepare.mexmaci64
- __MACOSX/NetDI_Code/NetDI/InfoTheoryTools/TRENTOOL3/._nn_prepare.mexmaci64
- NetDI_Code/NetDI/InfoTheoryTools/TRENTOOL3/nn_search.mexa64
- __MACOSX/NetDI_Code/NetDI/InfoTheoryTools/TRENTOOL3/._nn_search.mexa64
- NetDI_Code/NetDI/InfoTheoryTools/TRENTOOL3/range_search.mexw64
- __MACOSX/NetDI_Code/NetDI/InfoTheoryTools/TRENTOOL3/._range_search.mexw64
- NetDI_Code/NetDI/InfoTheoryTools/TRENTOOL3/nn_search.mexw64
- __MACOSX/NetDI_Code/NetDI/InfoTheoryTools/TRENTOOL3/._nn_search.mexw64
- NetDI_Code/NetDI/InfoTheoryTools/TRENTOOL3/range_search.mexa64
- __MACOSX/NetDI_Code/NetDI/InfoTheoryTools/TRENTOOL3/._range_search.mexa64
- NetDI_Code/NetDI/InfoTheoryTools/TRENTOOL3/range_search.mexmaci64
- __MACOSX/NetDI_Code/NetDI/InfoTheoryTools/TRENTOOL3/._range_search.mexmaci64
- NetDI_Code/NetDI/InfoTheoryTools/TRENTOOL3/nn_search.mexglx
- __MACOSX/NetDI_Code/NetDI/InfoTheoryTools/TRENTOOL3/._nn_search.mexglx
- NetDI_Code/NetDI/InfoTheoryTools/TRENTOOL3/nn_search.mexmaci64
- __MACOSX/NetDI_Code/NetDI/InfoTheoryTools/TRENTOOL3/._nn_search.mexmaci64
- NetDI_Code/NetDI/InfoTheoryTools/TRENTOOL3/range_search.mexglx
- __MACOSX/NetDI_Code/NetDI/InfoTheoryTools/TRENTOOL3/._range_search.mexglx
- NetDI_data/
- __MACOSX/._NetDI_data
- NetDI_data/NetDI_data/
- __MACOSX/NetDI_data/._NetDI_data
- NetDI_data/DCS_data/
- __MACOSX/NetDI_data/._DCS_data
- NetDI_data/NetDI_data/data_files/
- __MACOSX/NetDI_data/NetDI_data/._data_files
- NetDI_data/DCS_data/X_ts016.mat
- __MACOSX/NetDI_data/DCS_data/._X_ts016.mat
- NetDI_data/DCS_data/X_ta511.mat
- __MACOSX/NetDI_data/DCS_data/._X_ta511.mat
- NetDI_data/DCS_data/X_ta505.mat
- __MACOSX/NetDI_data/DCS_data/._X_ta505.mat
- NetDI_data/DCS_data/X_ta503.mat
- __MACOSX/NetDI_data/DCS_data/._X_ta503.mat
- NetDI_data/NetDI_data/data_files/conn_dens.mat
- __MACOSX/NetDI_data/NetDI_data/data_files/._conn_dens.mat
- NetDI_data/NetDI_data/data_files/edgebetcen.mat
- __MACOSX/NetDI_data/NetDI_data/data_files/._edgebetcen.mat
- NetDI_data/NetDI_data/data_files/kcores.mat
- __MACOSX/NetDI_data/NetDI_data/data_files/._kcores.mat
- NetDI_data/NetDI_data/data_files/indeg.mat
- __MACOSX/NetDI_data/NetDI_data/data_files/._indeg.mat
- NetDI_data/NetDI_data/data_files/outdeg.mat
- __MACOSX/NetDI_data/NetDI_data/data_files/._outdeg.mat
